# Supplementary material for: Aggresome assembly at the centrosome is driven by CP110–CEP97–CEP290 and centriolar satellites
Source: PubMed Central journal article supplement (PMC9033585; doi:10.1038/s41556-022-00869-0), 2022-04-11

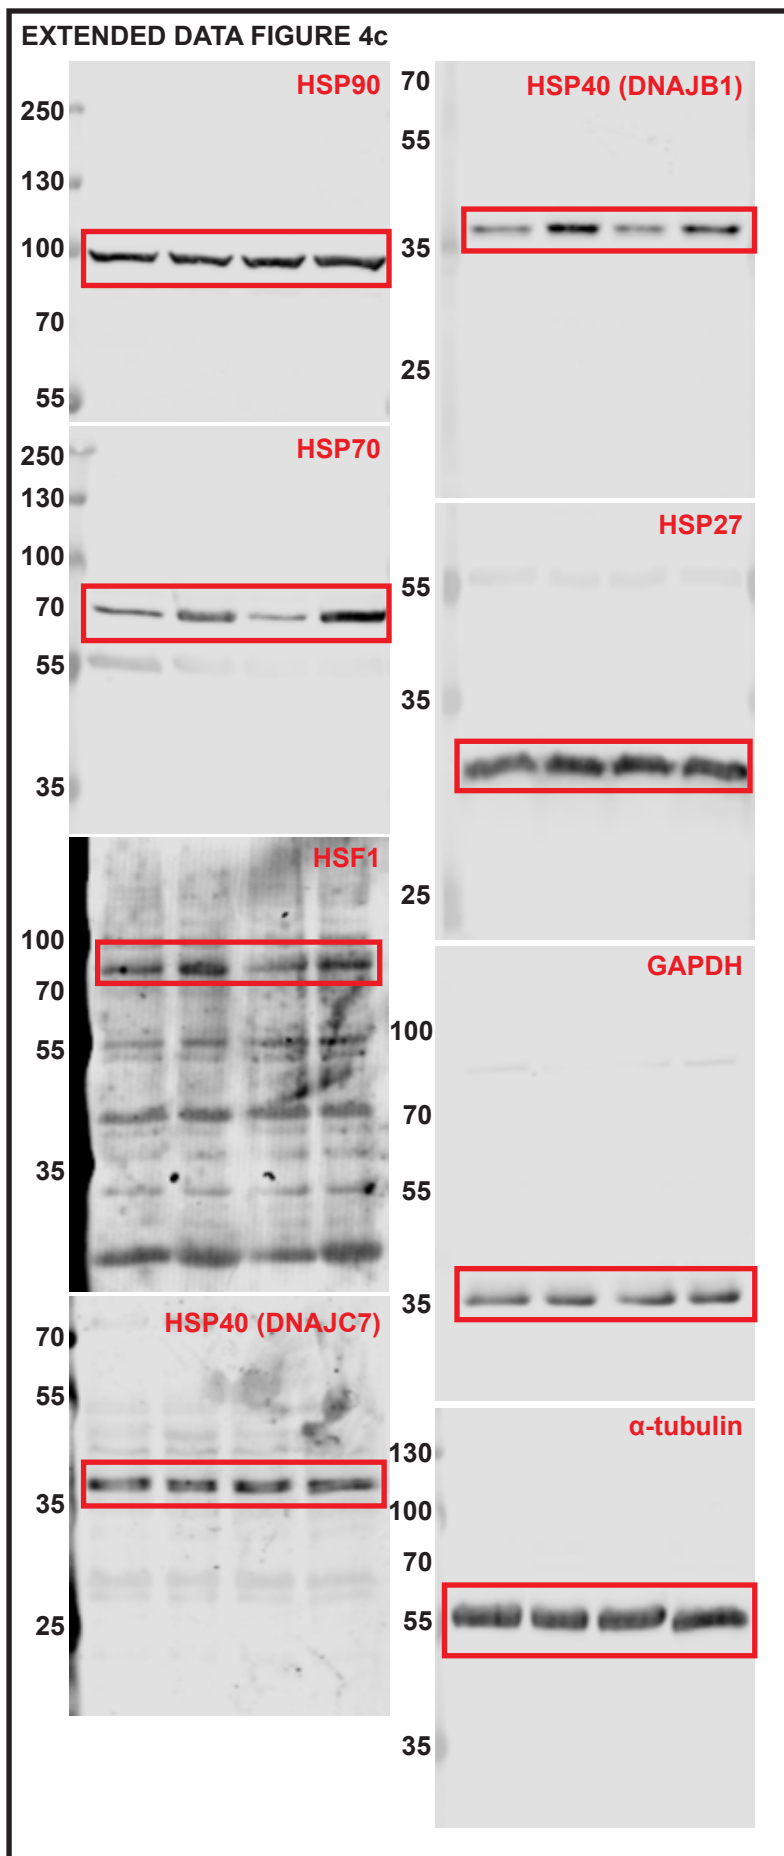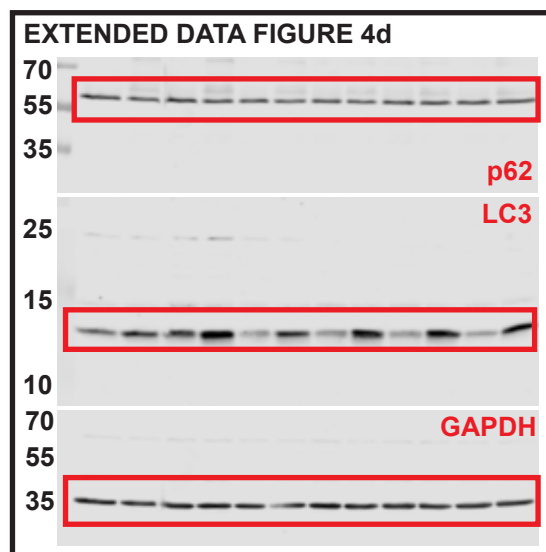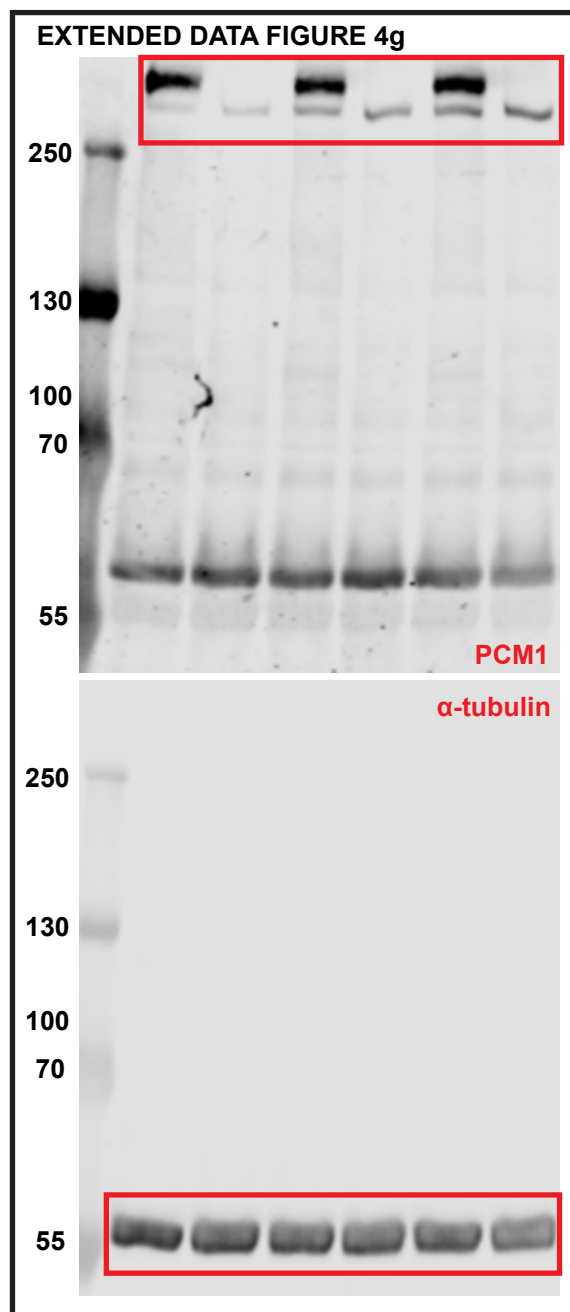

Supplement: 41556_2022_869_MOESM20_ESM.pdf [file 41556_2022_869_MOESM20_ESM.pdf]
